# Supplementary material for: Additional Serine/Threonine Phosphorylation Reduces Binding Affinity but Preserves Interface Topography of Substrate Proteins to the c-Cbl TKB Domain
Source: PubMed Central journal article supplement (PMC2943896; doi:10.1371/journal.pone.0012819), 2010-09-22
Supplement: pone.0012819.s001.pdf [file pone.0012819.s001.pdf]

| pSpry2 ATOMS | c-Cbl ATOMS  | DISTANCE |
|--------------|--------------|----------|
| 53(ASN) ND2  | 81(PRO) O    | 2.89     |
| 54(GLU) O    | 274(TYR) OH  | 2.67     |
| 55(PTR) OH   | 294(ARG) NH2 | 2.89     |
| 55(PTR) O2P  | 297(CYS) N   | 2.95     |
| 55(PTR) O3P  | 298(THR) N   | 2.87     |
|              | 298(THR) OG1 | 2.58     |
|              | 296(SER) OG  | 2.74     |
|              | 297(ARG) N   | 3.32     |
| 56(THR) N    | 316(GLN) O   | 2.83     |
| 56(TPO) O    | 317(THR) OG1 | 2.51     |
| 56(THR) OH   | 316(GLN) O   | 3.25     |
| 58(GLY) N    | 317(THR) OG1 | 3.17     |

| ppSpry2 ATOMS | c-Cbl ATOMS  | DISTANCE |
|---------------|--------------|----------|
| 51(ASN) ND2   | 79(ASN) O    | 2.82     |
|               | 86(ASP) OD2  | 2.78     |
| 53(ASN) OD1   | 81(PRO) O    | 2.98     |
| 54(GLU) O     | 274(TYR) OH  | 2.69     |
| 55(PTR) O2P   | 294(ARG) NH1 | 2.86     |
|               | 297(CYS) N   | 3.06     |
| 55(PTR) O3P   | 296(SER) OG  | 2.66     |
|               | 298(THR) N   | 2.89     |
|               | 298(THR) OG1 | 2.75     |
| 55(PTR) OH    | 294(ARG) NH2 | 2.87     |
| 56(TPO) N     | 316(GLN) O   | 2.86     |
| 56(TPO) O     | 317(THR) OG1 | 2.83     |
| 58(GLY) N     | 317(THR) OG1 | 3.06     |

| pEGFR ATOMS   | c-Cbl ATOMS  | DISTANCE |
|---------------|--------------|----------|
| 1068(ARG) O   | 274(TYR) OH  | 2.81     |
| 1068(ARG) NH1 | 81(PRO) N    | 3.17     |
|               | 81(PRO) O    | 2.81     |
| 1068(ARG) NH2 | 81(PRO) O    | 2.66     |
| 1069(PTR) OH  | 294(ARG) NH2 | 2.88     |
| 1069(PTR) O2P | 294(ARG) NH2 | 3.03     |
| 1069(PTR) O3P | 298(THR) N   | 2.77     |
|               | 298(THR) OG1 | 2.94     |
|               | 296(SER) OG  | 3.13     |
| 1070(SER) N   | 316(GLN) O   | 2.75     |
| 1070(SER) O   | 317(THR) OG1 | 2.56     |
| 1072(ASP) OD2 | 322(LYS) NZ  | 3.06     |
| 1074(THR) OG1 | 334(GLU) OE1 | 2.96     |

| ppEGFR ATOMS  | c-Cbl ATOMS  | DISTANCE |
|---------------|--------------|----------|
| 1067(GLN) NE2 | 314(ILE) O   | 3.11     |
| 1068(ARG) NH2 | 81(PRO) O    | 2.78     |
| 1068(ARG) O   | 274(TYR) OH  | 2.73     |
| 1069(PTR) O2P | 294(ARG) NH2 | 3.15     |
|               | 297(CYS) N   | 3.00     |
| 1069(PTR) O3P | 296(SER) OG  | 2.67     |
|               | 298(THR) N   | 2.81     |
|               | 298(THR) OG1 | 2.53     |
| 1069(PTR) OH  | 294(ARG) NH2 | 2.67     |
| 1070(SEP) N   | 316(GLN) O   | 2.86     |
| 1070(SEP) O   | 317(THR) OG1 | 2.85     |
| 1074(THR) OG1 | 322(LYS) NZ  | 2.89     |
